# Supplementary material for: Beyond the ABCs—Discovery of Three New Plasmid Types in Rhodobacterales (RepQ, RepY, RepW)
Source: MDPI journal article supplement (doi:10.3390/microorganisms10040738), 2022-03-29

# Mapping of PacBio and Illumina reads on replicons of *Sulfitobacter dubius* DSM 109990

A) Mapping of PacBio (top) and Illumina (bottom) reads on cDSM109990 (1-25 kb)

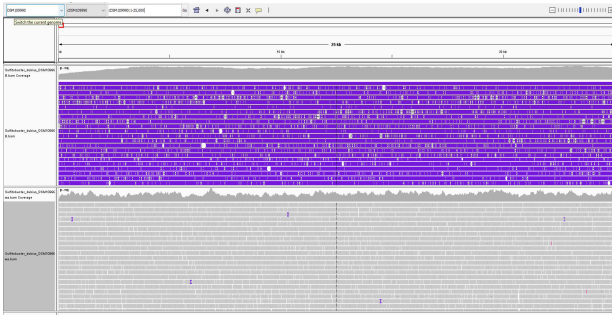

B) Mapping of PacBio (top) and Illumina (bottom) reads on pDSM109990\_a (1-25 kb)

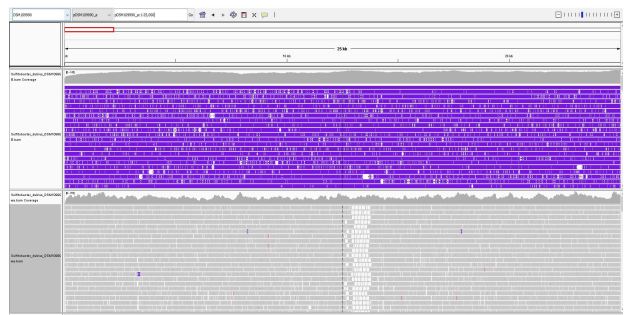

C) Mapping of PacBio (top) and Illumina (bottom) reads on pDSM109990\_b (1-25 kb)

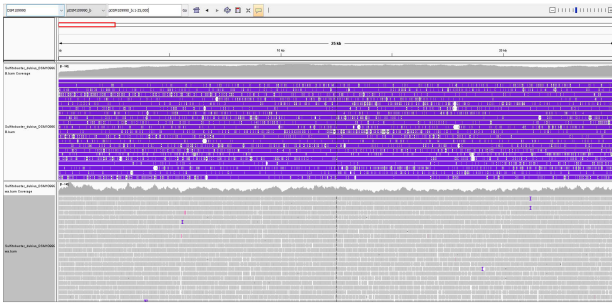

D) Mapping of PacBio (top) and Illumina (bottom) reads on pDSM109990\_c (1-25 kb)

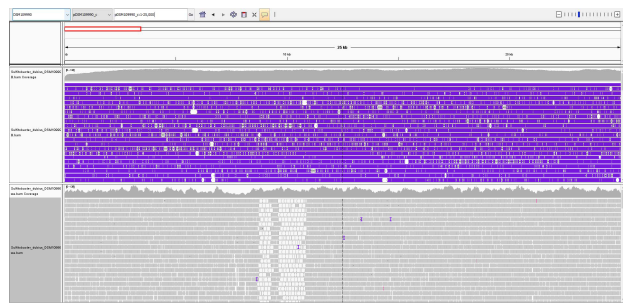

E) Mapping of PacBio (top) and Illumina (bottom) reads on pDSM109990\_d (1-25 kb)

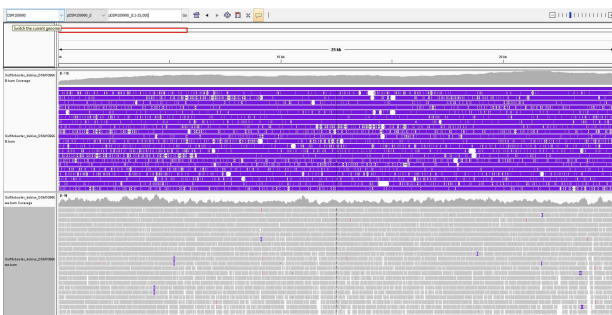

F) Mapping of PacBio (top) and Illumina (bottom) reads on pDSM109990\_e (1-25 kb)

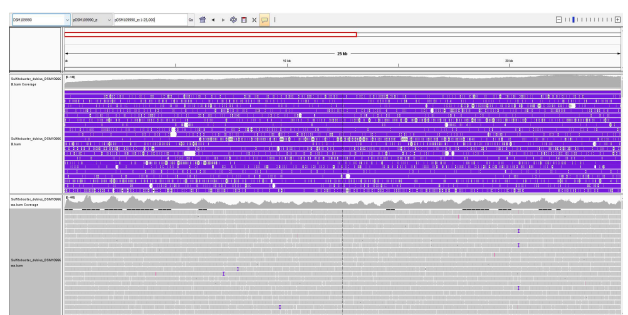

G) Mapping of PacBio (top) and Illumina (bottom) reads on pDSM109990\_f

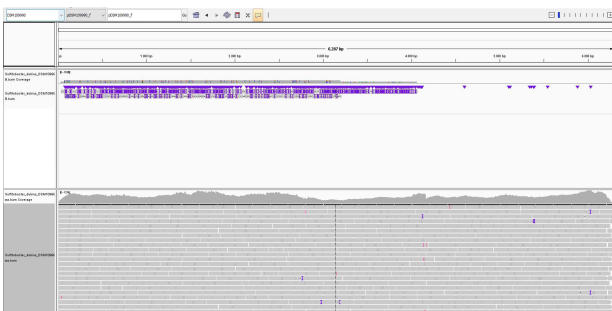

H) Mapping of PacBio (top) and Illumina (bottom) reads on pDSM109990\_g

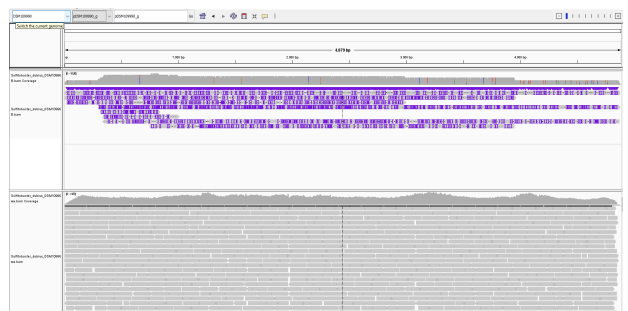

I) Mapping of PacBio (top) and Illumina (bottom) reads on pDSM109990\_h

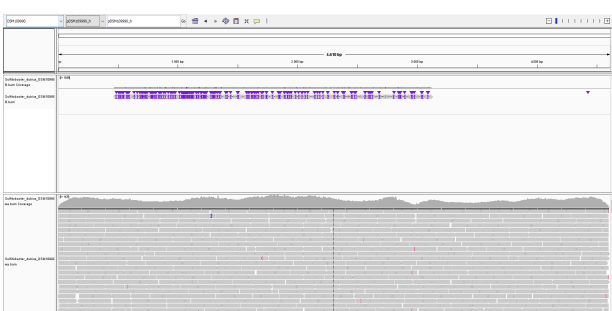

J) Mapping of PacBio (top) and Illumina (bottom) reads on pDSM109990\_i

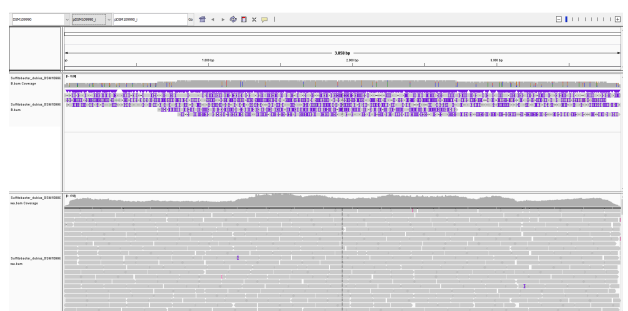

Supplement: s1 [file s1]
