# Supplementary material for: Beyond the ABCs—Discovery of Three New Plasmid Types in Rhodobacterales (RepQ, RepY, RepW)
Source: MDPI journal article supplement (doi:10.3390/microorganisms10040738), 2022-03-29

**A**

**RepQ**  
*S. indolifex*  
DSM 14862<sup>T</sup>

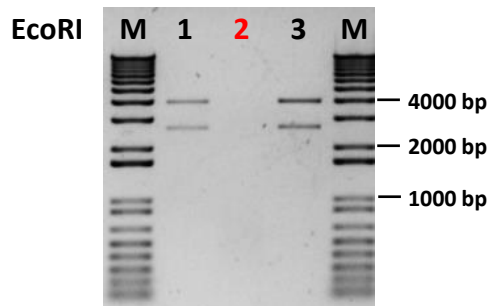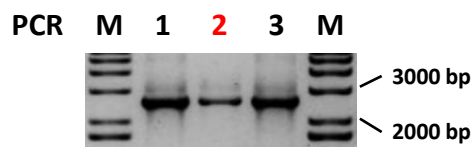**B**

**RepY**  
*S. pontiacus*  
DSM 110277

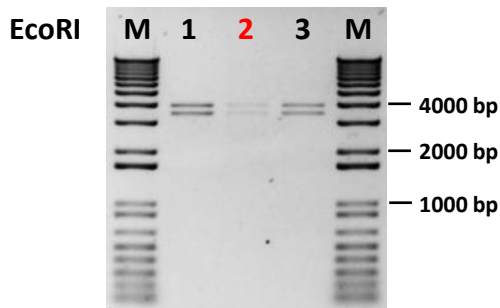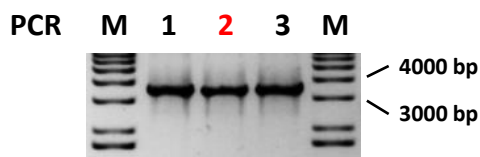**C**

**RepW**  
*S. dubius*  
DSM 109990

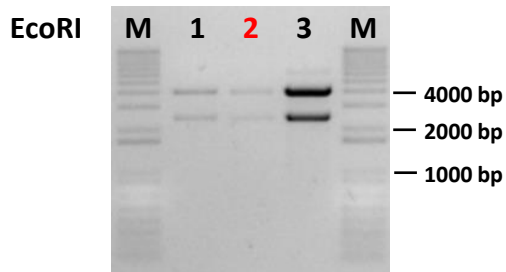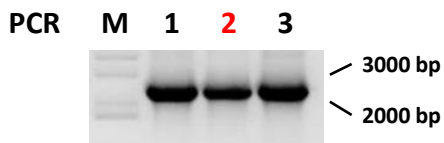

**RepW**  
*Sulfitobacter* sp.  
DSM 110093

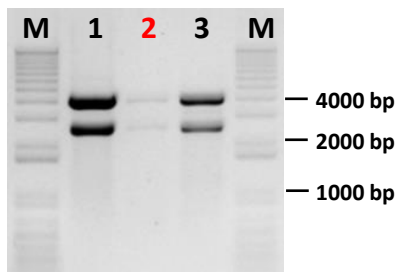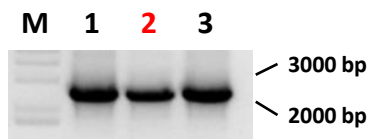

**RepW**  
*Pseudosulfitobacter* sp.  
DSM 107133

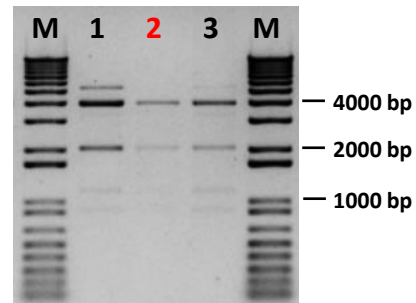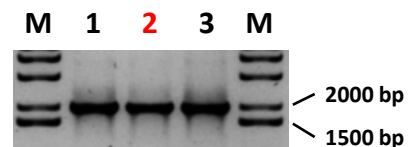

Supplement: s1 [file s1]
