# Supplementary material for: Beyond the ABCs—Discovery of Three New Plasmid Types in Rhodobacterales (RepQ, RepY, RepW)
Source: MDPI journal article supplement (doi:10.3390/microorganisms10040738), 2022-03-29

Sulfitobacter\_sp\_DSM110093\_ref

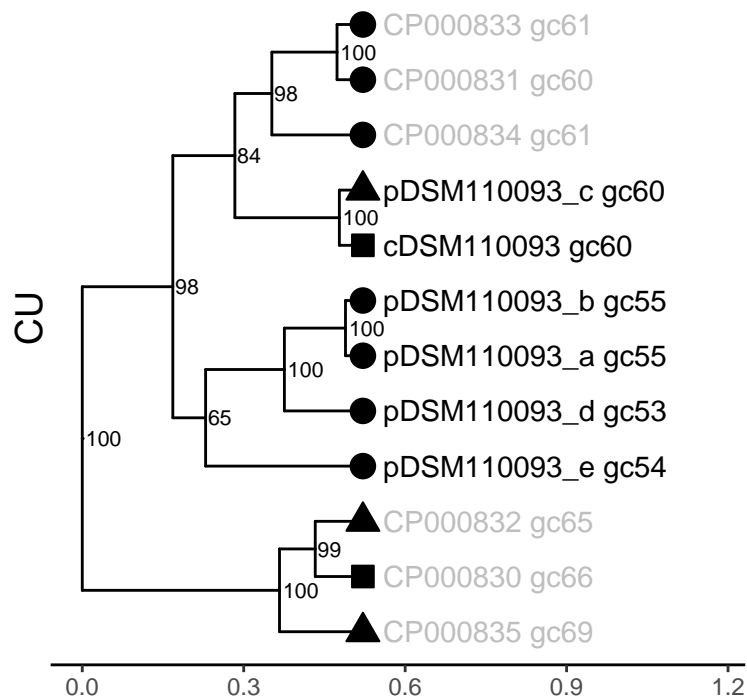

Sulfitobacter\_dubius\_DSM109990\_ref

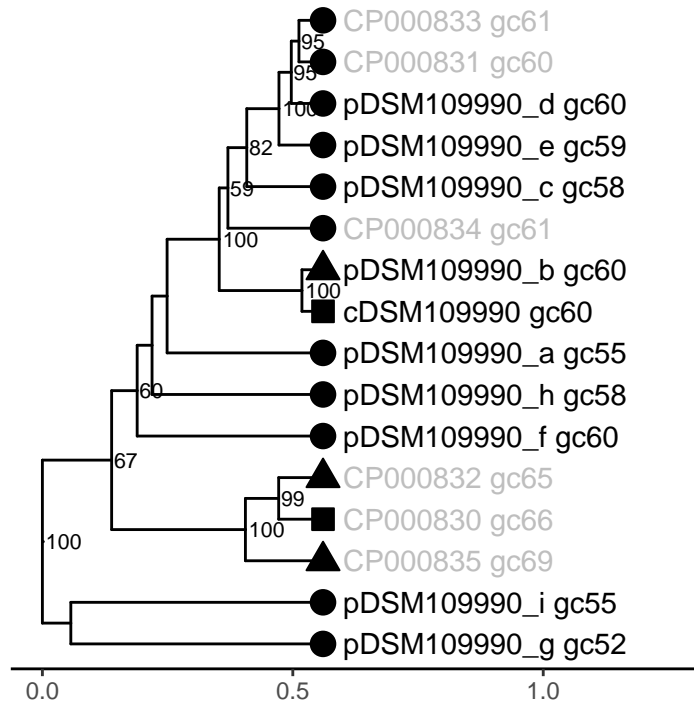

Sulfitobacter\_indolifex\_DSM14862\_ref

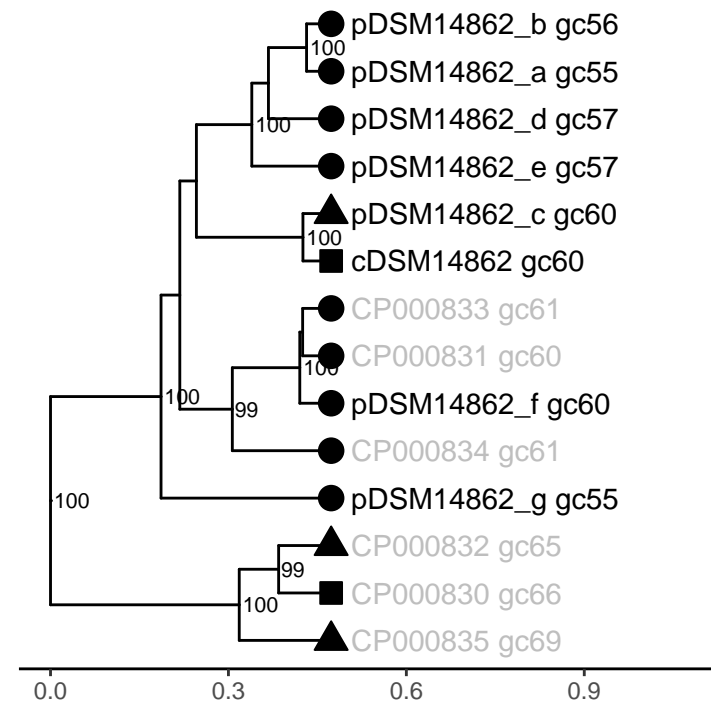

Sulfitobacter\_sp\_DSM110093\_ref

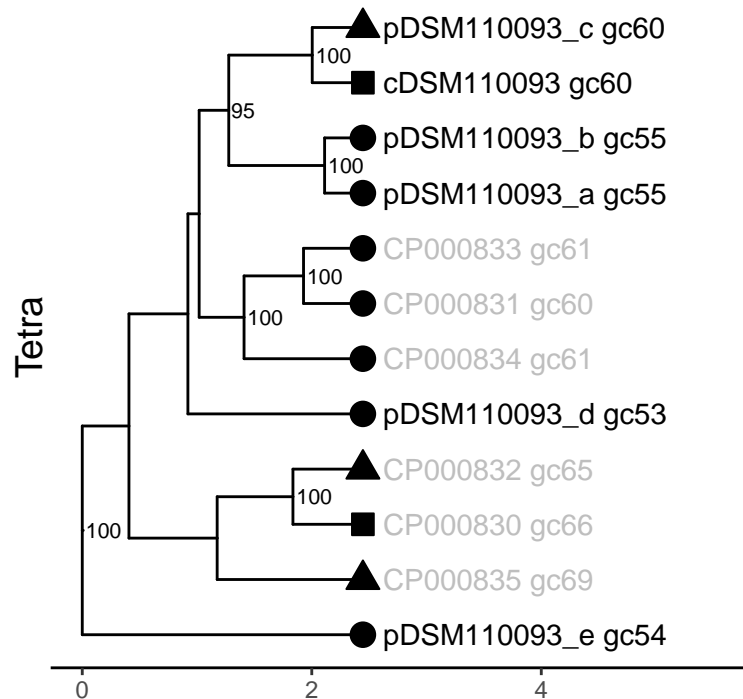

Sulfitobacter\_dubius\_DSM109990\_ref

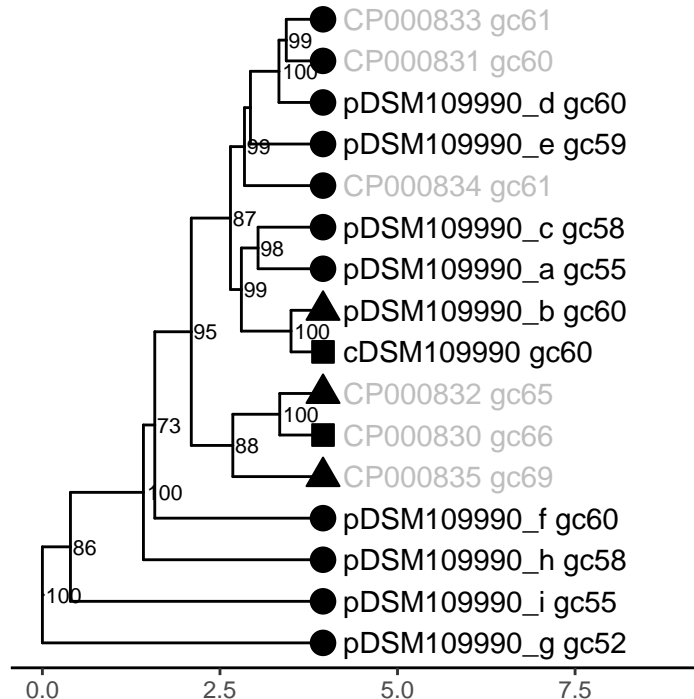

Sulfitobacter\_indolifex\_DSM14862\_ref

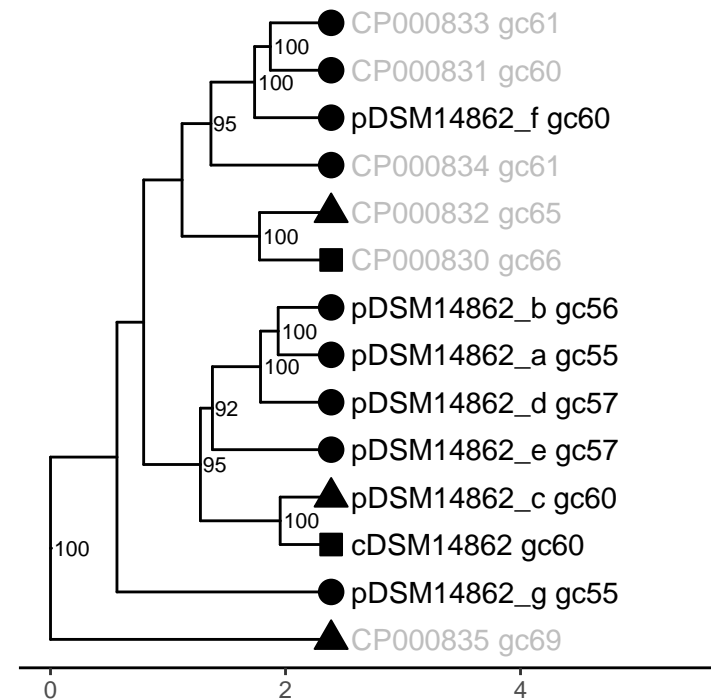

Sulfitobacter\_pontiacus\_DSM110277\_ref

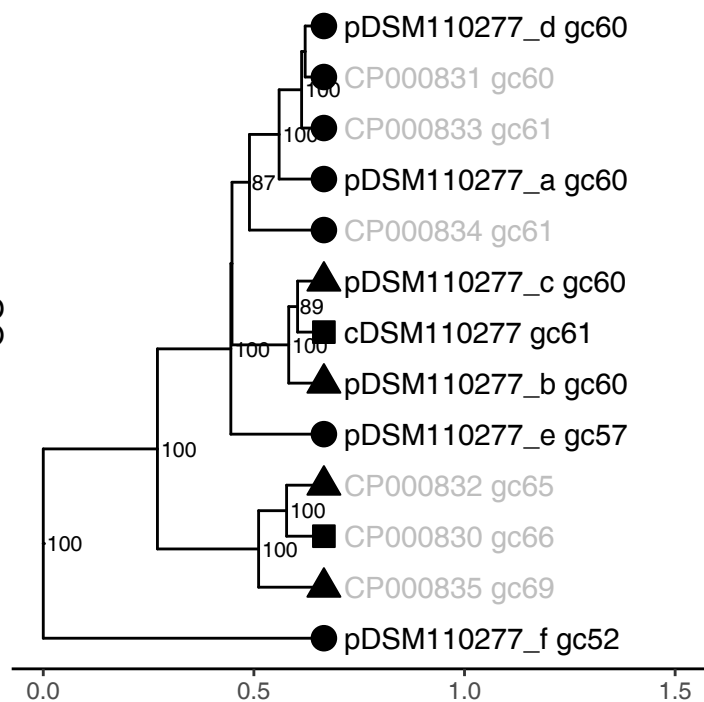

Pseudosulfitobacter\_sp\_DSM107133\_ref

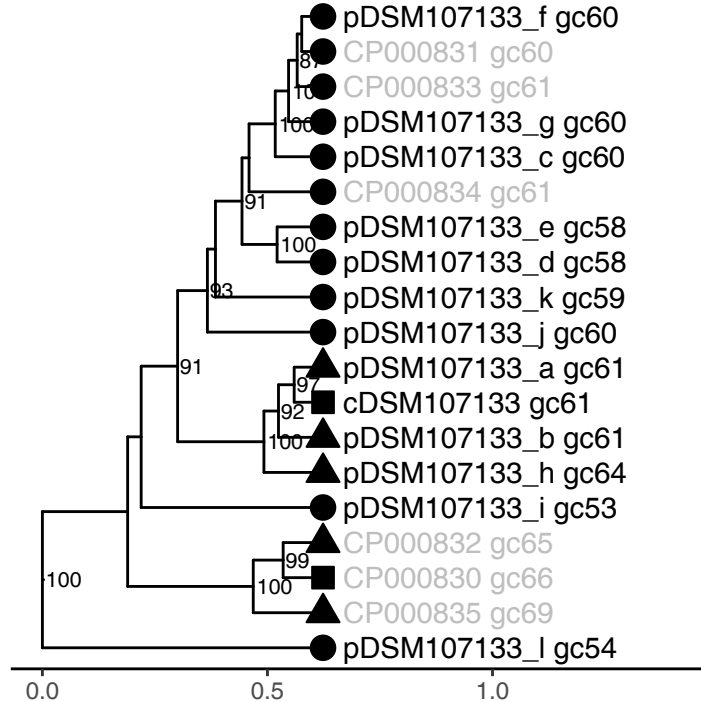

Sulfitobacter\_pontiacus\_DSM110277\_ref

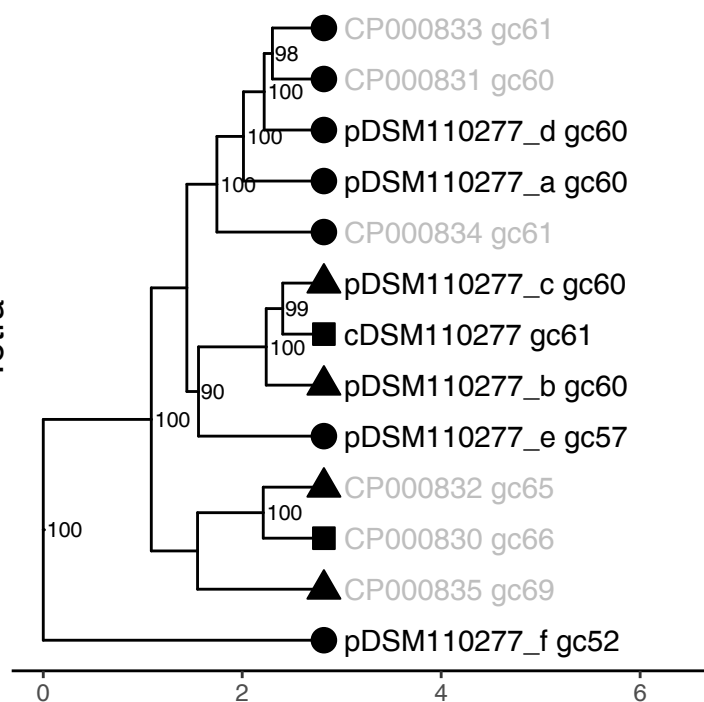

Pseudosulfitobacter\_sp\_DSM107133\_ref

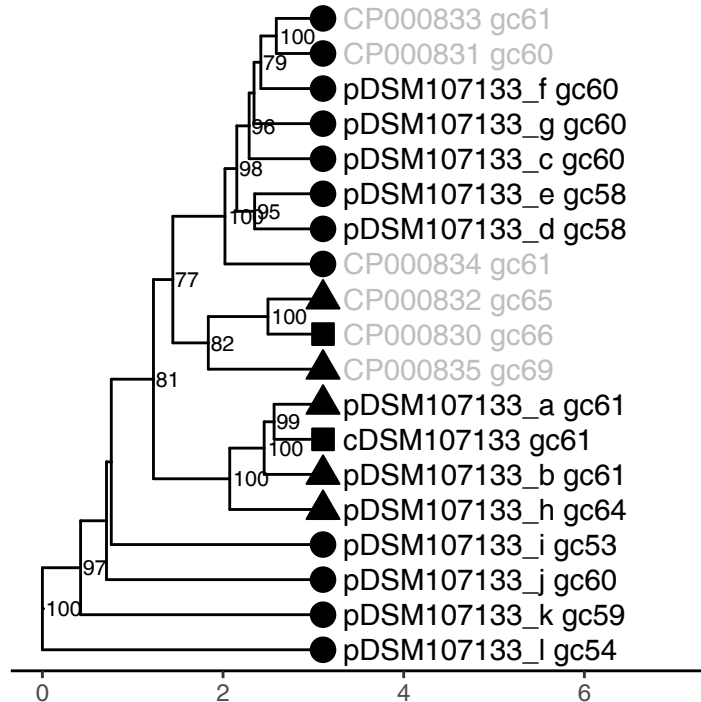

Supplement: s1 [file s1]
