# Supplementary figures and images for: Beyond the ABCs—Discovery of Three New Plasmid Types in Rhodobacterales (RepQ, RepY, RepW)
Source: MDPI journal article supplement (doi:10.3390/microorganisms10040738), 2022-03-29

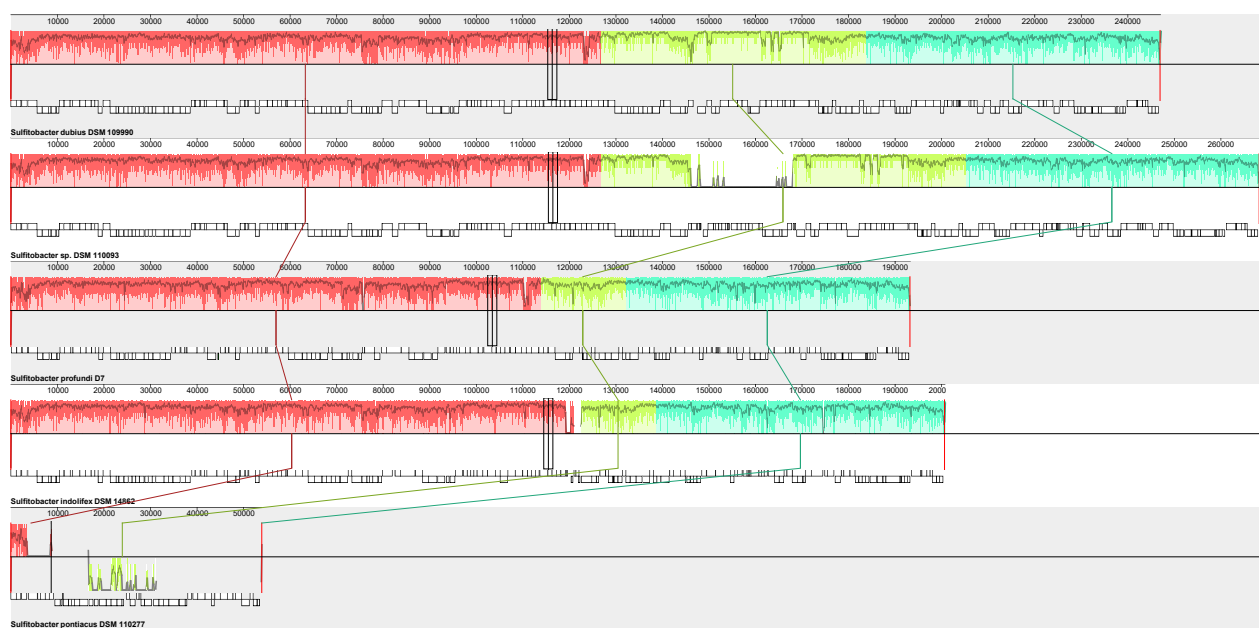

Supplement: s1 [file s1]

# Phylogenetic tree of RepQ-type plasmid replicases

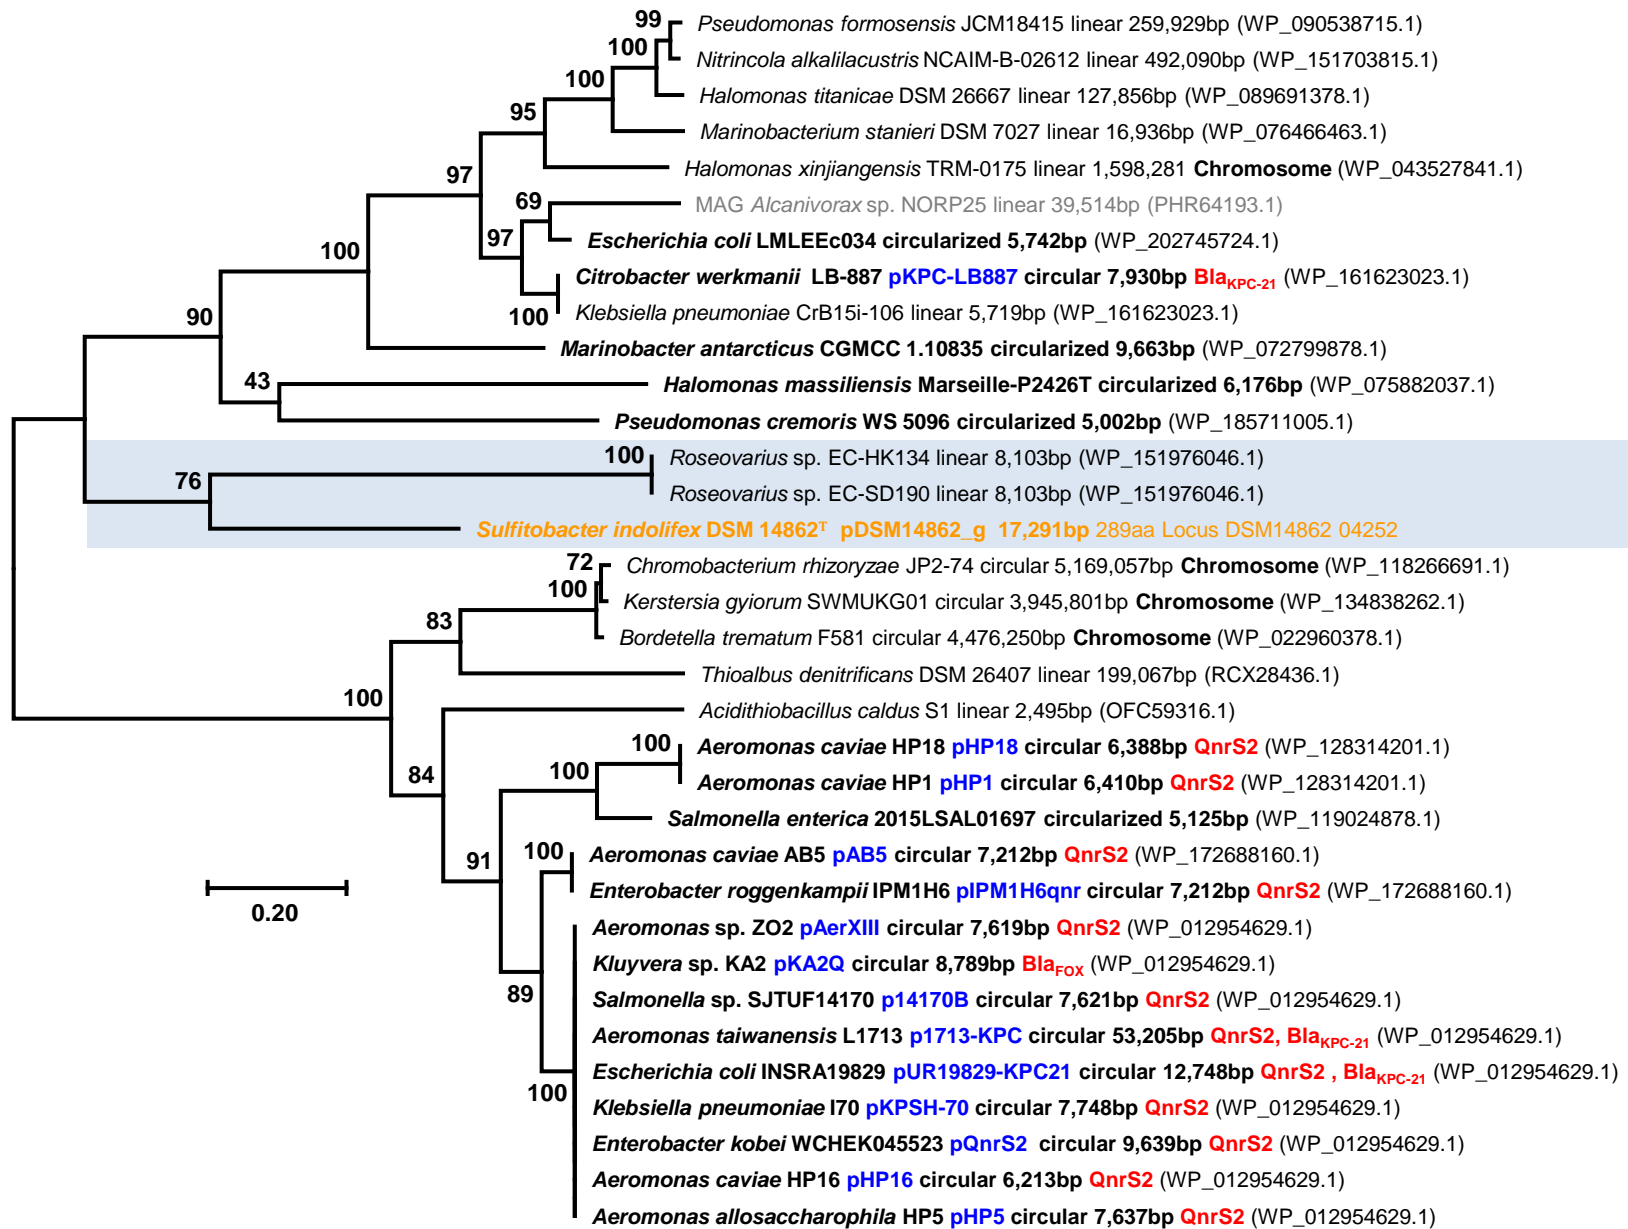

Figure S6

Supplement: s1 [file s1]

# Phylogenetic tree of RepW-type replicases

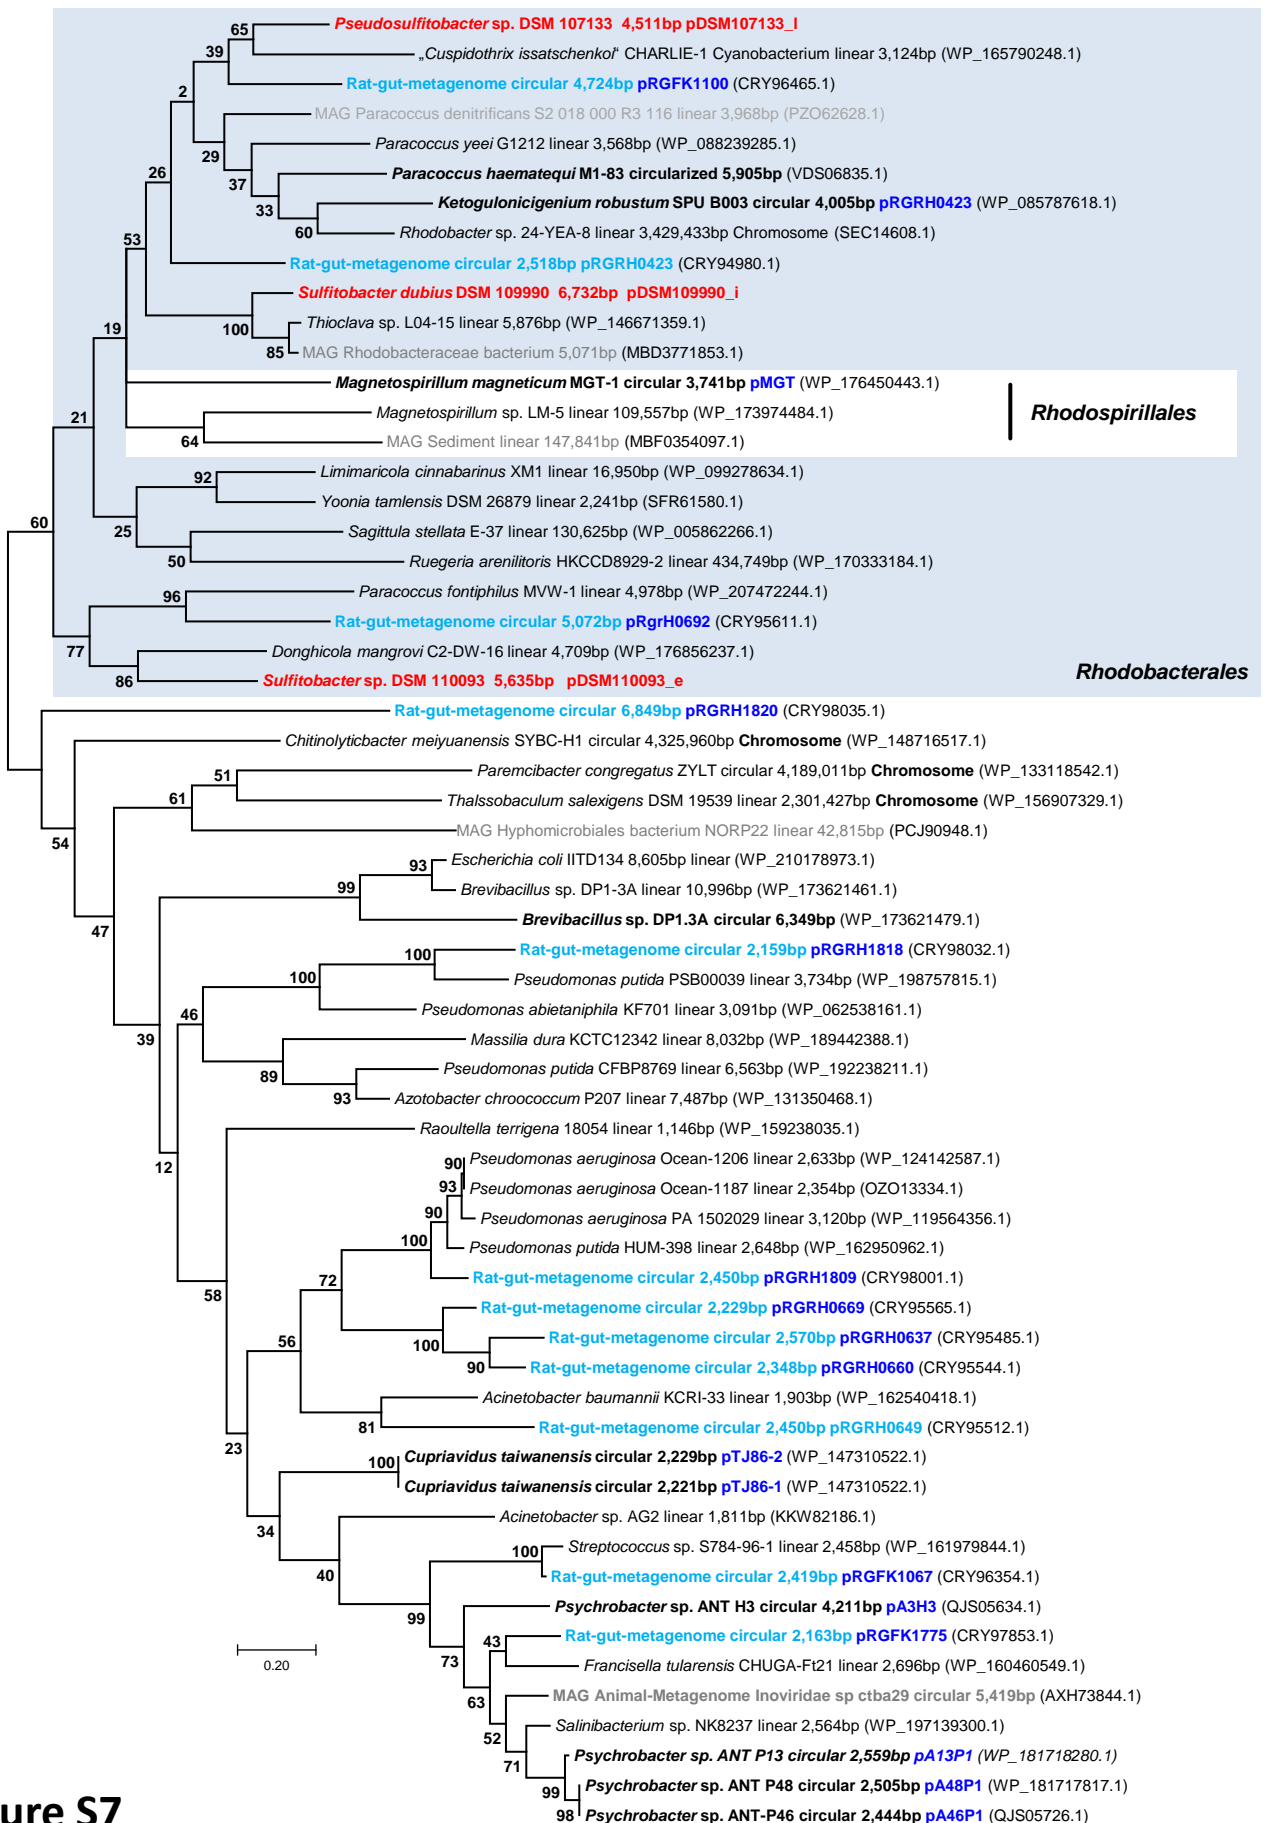

Figure S7

Supplement: s1 [file s1]

## Phylogenomic tree

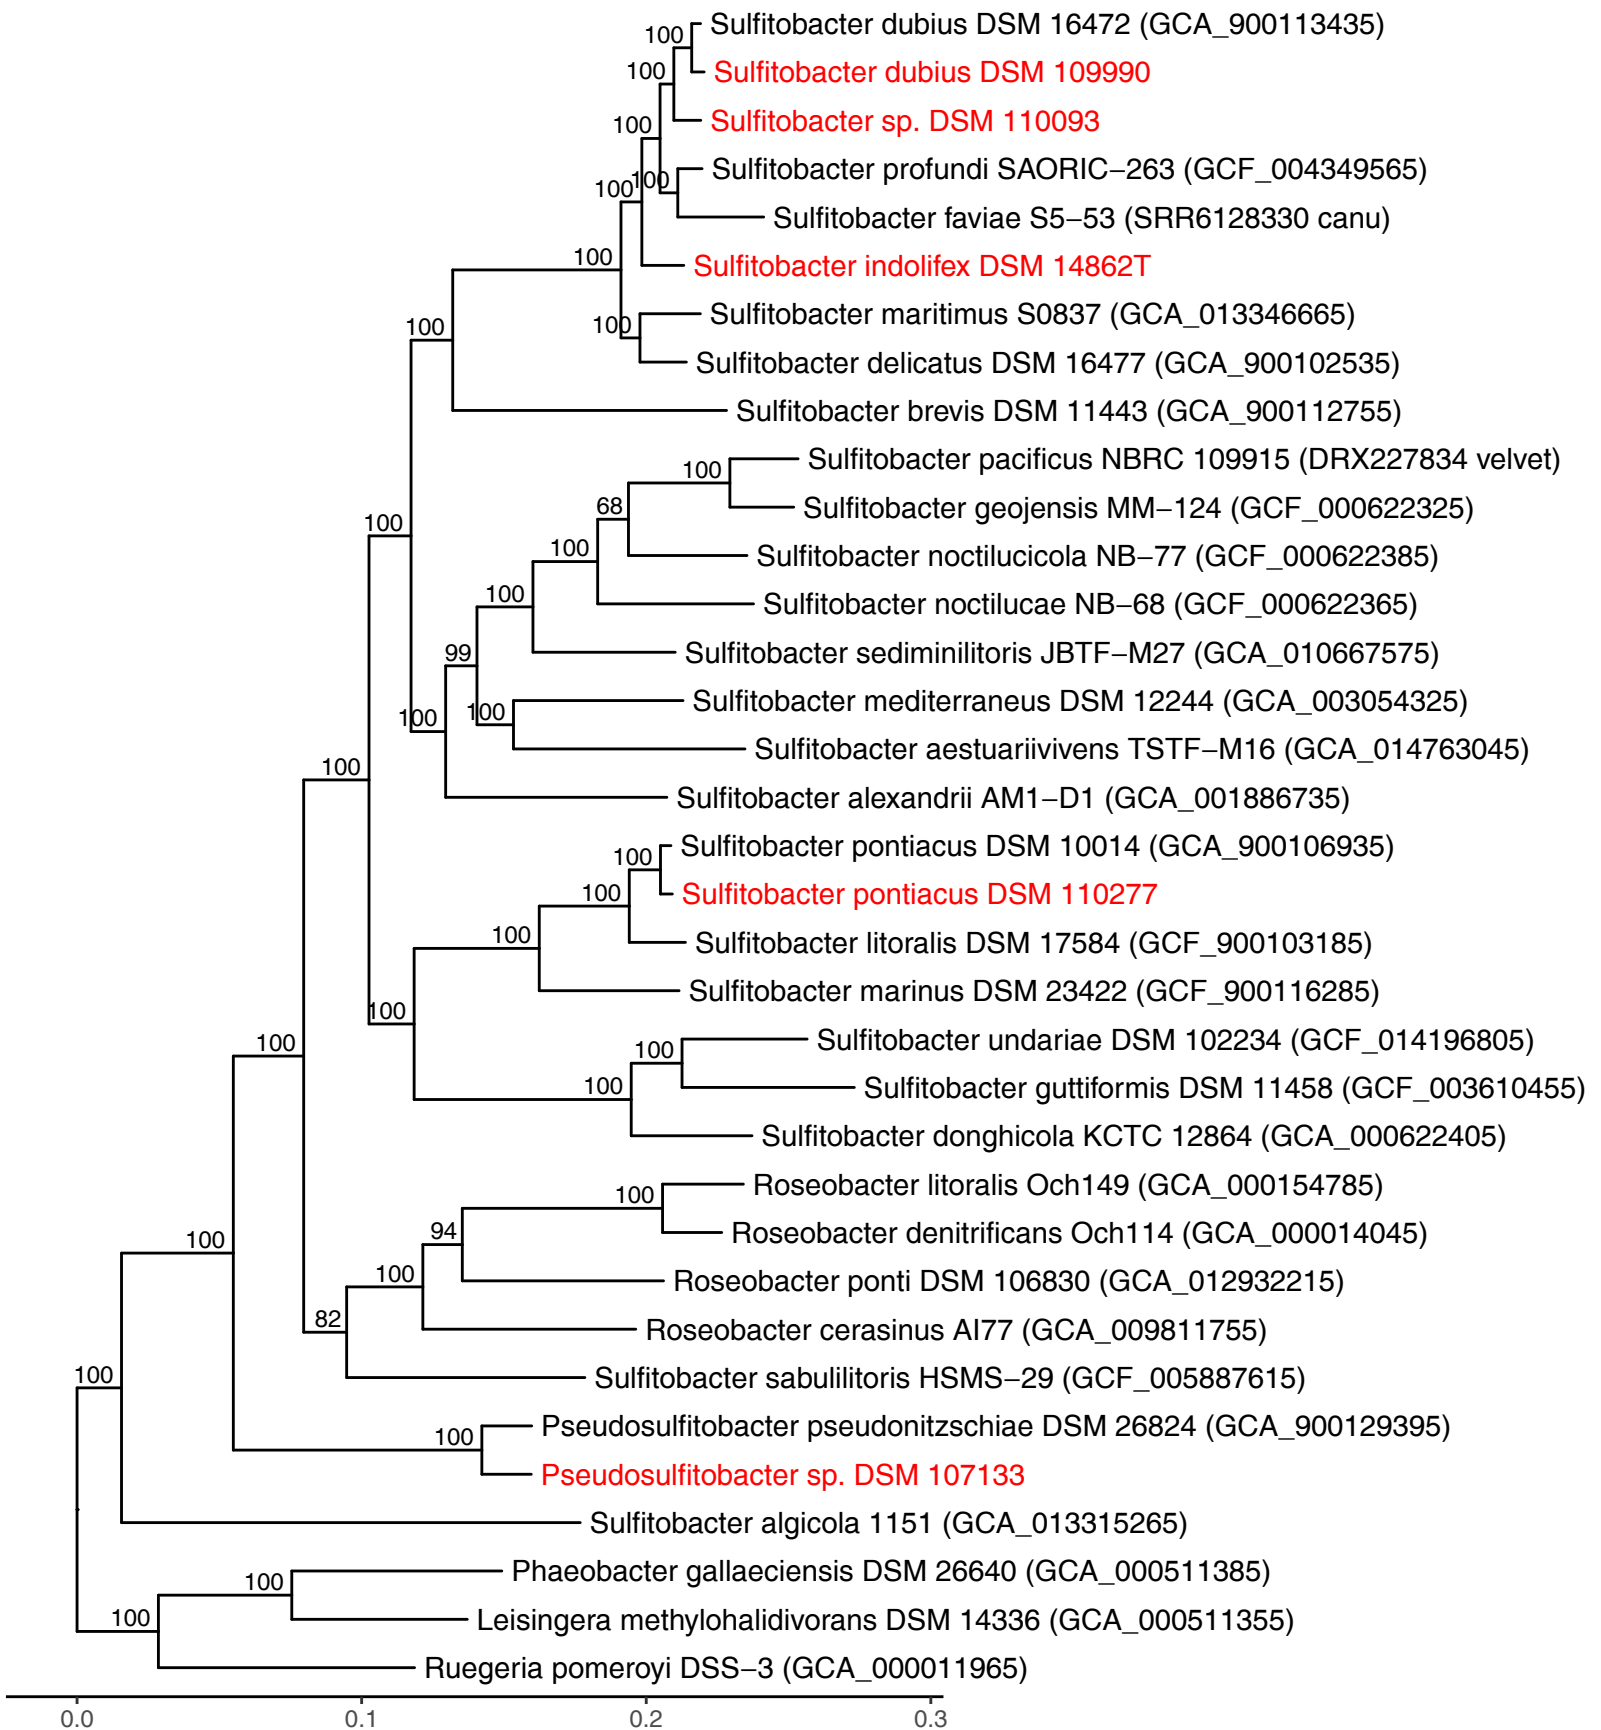

Supplement: s1 [file s1]
